# Supplementary material
Source: PubMed Central journal article supplement (PMC391065)
Supplement: 7600155s1.pdf [file 7600155s1.pdf]

# Supplementary Fig.1

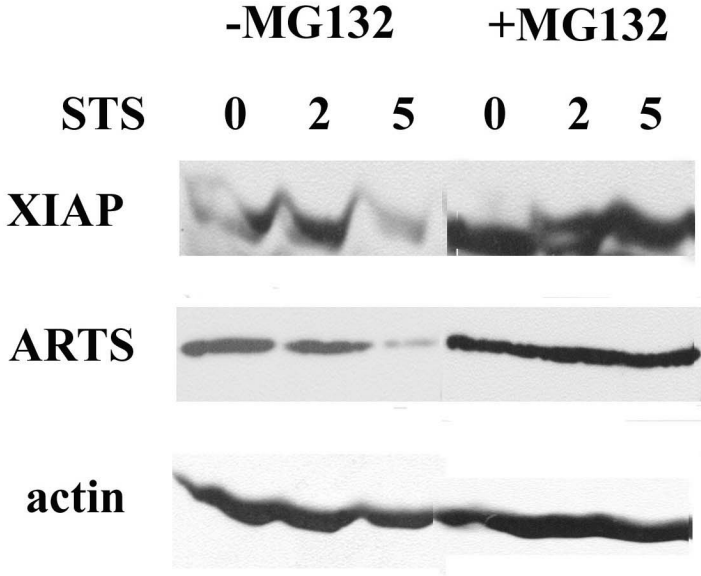

# Supplementary Fig. 2

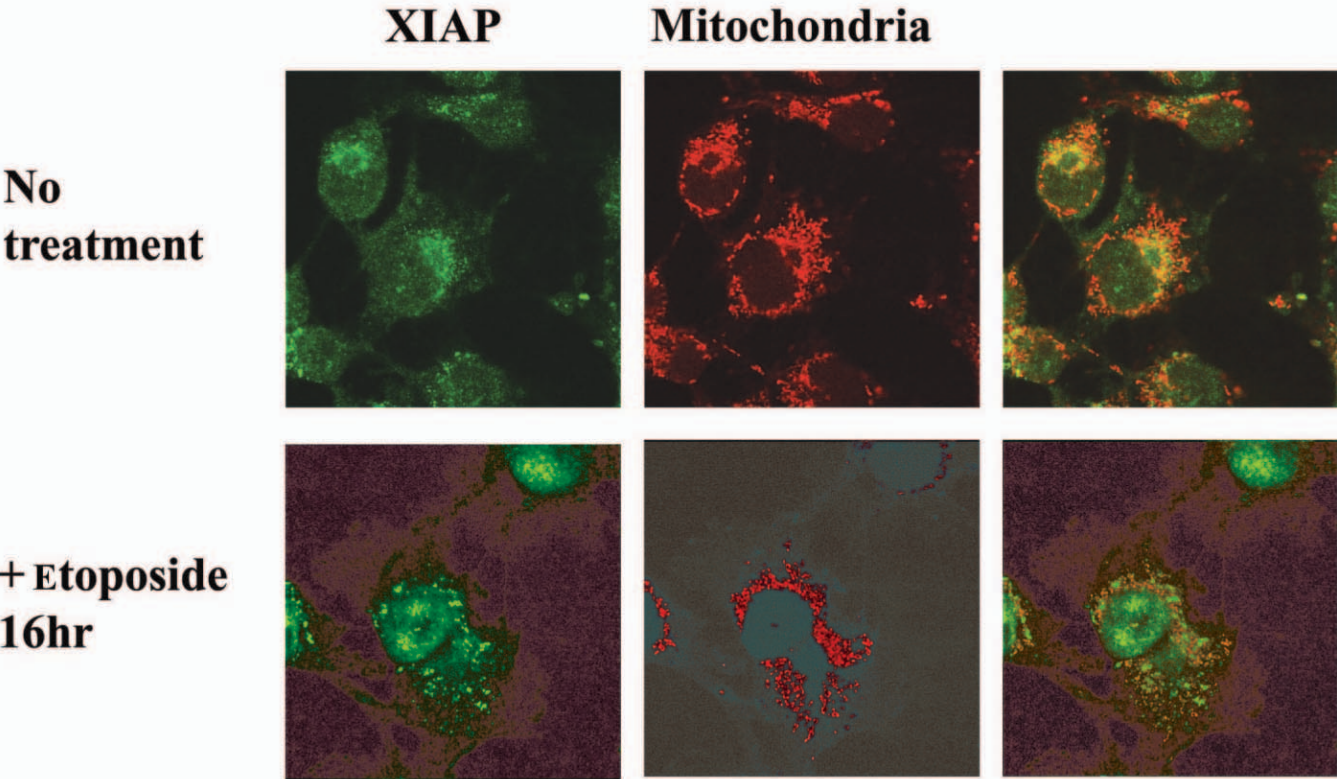

### **Supplementary Figure legends:**

#### **Supplementary Figure 1. Treatment of COS-7 cells with proteasome inhibitor blocks ARTS induced reduction of XIAP levels .**

COS-7 cells were transiently transfected with AU5-ARTS. The cells were treated with staurosporine (STS) (1 $\mu$ M) for 2 and 5 hours with and without proteasome inhibitor (MG132 – 20 $\mu$ M). Treatment of cells with MG-132 inhibits ARTS induced reduction of XIAP levels.

#### **Supplementary Figure 2. XIAP sub-cellular localization during**

**apoptosis.** Immunofluorescence assay of COS-7 cells with anti XIAP antibodies (green) and MitoTracker® Red CMXRos shows a punctated staining of XIAP in the cytosol with aggregates at the peri-nuclear zone.

Upon apoptotic stimuli a weak diffused staining is observed within the nuclei, though most of XIAP remains in the cytosol. In contrast, in apoptotic cells overexpressing ARTS, most of XIAP was translocated to the nucleus (Figure 5).
